# Supplementary material for: Electrochemical Synthesis, Magnetic and Optical Characterisation of FePd Dense and Mesoporous Nanowires
Source: MDPI journal article supplement (doi:10.3390/nano13030403), 2023-01-19
Supplement: s1 [file s1]

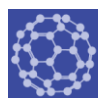

# Electrochemical Synthesis, Magnetic and Optical Characterisation of FePd Dense and Mesoporous Nanowires

Deepthi Raj <sup>1</sup>, Gabriele Barrera <sup>2</sup>, Federico Scaglione <sup>1</sup>, Federica Celegato <sup>2</sup>, Matteo Cialone <sup>1,3</sup>, Marco Coisson <sup>2</sup>, Paola Tiberto <sup>2</sup>, Jordi Sort <sup>4,5</sup>, Paola Rizzi <sup>1,\*</sup> and Eva Pellicer <sup>4</sup>

<sup>1</sup> Dipartimento di Chimica e Centro Interdipartimentale NIS (Nanostructured Interfaces and Surfaces), Università di Torino, Via Pietro Giuria 7, 10125 Torino, Italy

<sup>2</sup> Istituto Nazionale di Ricerca Metrologica (INRIM), Str. delle Cacce 91, 10135 Torino, Italy

<sup>3</sup> Physics Department, University of Genova, Via Dodecaneso 33, 16146 Genova, Italy

<sup>4</sup> Universitat Autònoma de Barcelona, Campus de la UAB, Bellaterra, 08193 Barcelona, Spain

<sup>5</sup> Institució Catalana de Recerca i Estudis Avançats (ICREA), Pg. Lluís Companys 23, 08010 Barcelona, Spain

\* Correspondence: paola.rizzi@unito.it

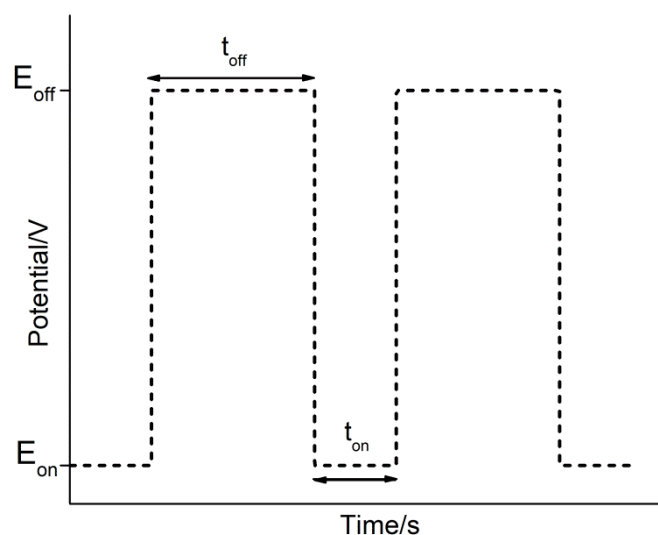

**Figure S1.** Pulsed potentiostatic electrodeposition scheme: during  $t_{on}$ , the potential  $E_{on}$  is applied at the selected deposition sites; during  $t_{off}$ , the electrodes are brought back to the initial open-circuit potential  $E_{off}$ .

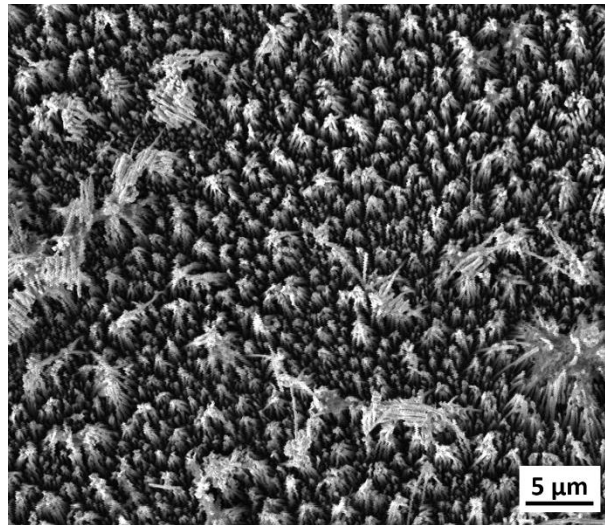

**Figure S2.** SEM image of the top surface of Porous-A nanowires partially embedded in the AAO template.

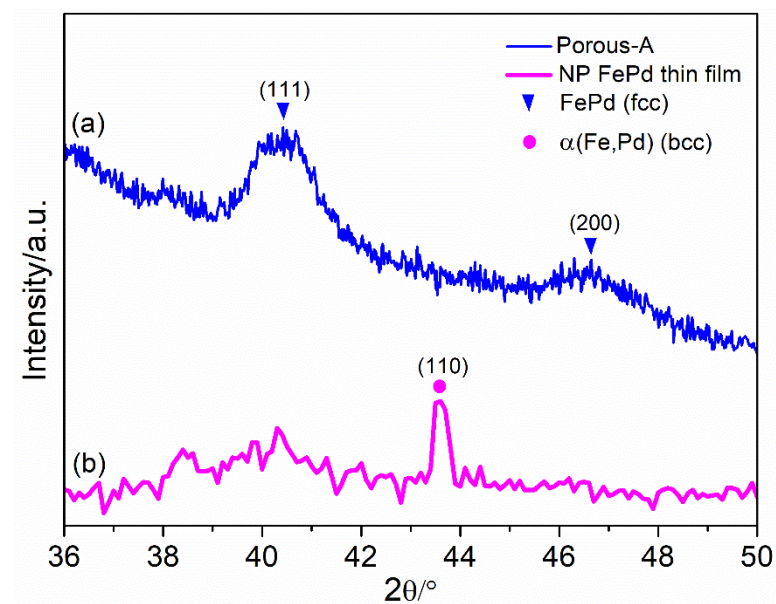

**Figure S3.** (a) XRD pattern of the as-deposited Porous-A embedded in the AAO template. (b) XRD pattern of Cialone et. al's nanoporous (NP) FePd thin film. .
